# Supplementary material for: Three Rounds of Read Correction Significantly Improves Eukaryotic Protein Detection in ONT Reads
Source: Preprints.org preprint supplement (doi:10.20944/preprints202312.0302.v1), 2023-12-06
Supplement: Supplementary file 1 [file supplementary]

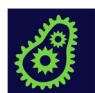

Table S1. The SRA numbers of sequencing reads (FASTQ), sequencing dates, base-call model used, and number of bases of all samples used in this study

| Species              | Sample number | SRA number  | Sequencing Date | Caller Used       | Model                                          | Number of Bases | Reference |
|----------------------|---------------|-------------|-----------------|-------------------|------------------------------------------------|-----------------|-----------|
| <i>C. albicans</i>   | Sample 1      | SRR19900988 | 29-06-2022      | Guppy (v6.0.1)    |                                                | 39.6M           | [48]      |
|                      | Sample 2      | SRR19901033 | 29-06-2022      | Guppy (v6.0.1)    |                                                | 74.8M           | [48]      |
|                      | Sample 3      | SRR7874309  | 18-09-2018      | Guppy (v6.0.1)    |                                                | 1.1G            | [49]      |
|                      | Sample 4      | SRR21528967 | 19-12-2022      | GridION           | X5 platform set to super accurate base calling | 709.6M          | [50]      |
|                      | Sample 5      | SRR17110952 | 08-12-2021      | GridION           |                                                | 1.5G            | N/A       |
|                      | Sample 6      | SRR17110953 | 08-12-2021      | GridION           |                                                | 2.3G            | N/A       |
| <i>C. gattii</i>     | Sample 1      | SRR23862319 | 17-03-2023      | N/A               |                                                | 77.9M           | [51]      |
|                      | Sample 2      | SRR23862320 | 17-03-2023      | N/A               |                                                | 244M            | [51]      |
|                      | Sample 3      | SRR23862321 | 17-03-2023      | N/A               |                                                | 221.5M          | [51]      |
|                      | Sample 4      | SRR23862337 | 17-03-2023      | N/A               |                                                | 308.3M          | [51]      |
|                      | Sample 5      | SRR8435355  | 31-10-2019      | Albacore (v2.3.1) |                                                | 319.1M          | [52]      |
|                      | Sample 6      | SRR8435356  | 31-10-2019      | Albacore (v2.3.1) |                                                | 604.9M          | [52]      |
| <i>S. cerevisiae</i> | Sample 1      | ERR8609718  | 27-11-2022      | Metrichor         |                                                | 1.4G            | [53]      |
|                      | Sample 2      | ERR8562481  | 27-11-2022      | Metrichor         |                                                | 1.6G            | [53]      |
|                      | Sample 3      | ERR8562480  | 27-11-2022      | Metrichor         |                                                | 1.3G            | [53]      |
|                      | Sample 4      | ERR8562473  | 27-11-2022      | Metrichor         |                                                | 593.7M          | [53]      |
|                      | Sample 5      | ERR8562469  | 27-11-2022      | Metrichor         |                                                | 811.9M          | [53]      |
|                      | Sample 6      | ERR8562397  | 27-11-2022      | Metrichor         |                                                | 857.5M          | [53]      |
| <i>P. falciparum</i> | Sample 1      | ERR10160144 | 02-10-2022      | MinIT (v18.09.1)  |                                                | 2.9G            | [54]      |
|                      | Sample 2      | ERR10160143 | 02-10-2022      | MinIT (v18.09.1)  |                                                | 1.2G            | [54]      |
|                      | Sample 3      | ERR10160142 | 02-10-2022      | MinIT (v18.09.1)  |                                                | 1.1G            | [54]      |

---

|          |             |            |                     |        |      |
|----------|-------------|------------|---------------------|--------|------|
| Sample 4 | ERR10160141 | 02-10-2022 | MinIT<br>(v18.09.1) | 902.7M | [54] |
| Sample 5 | ERR10502702 | 01-12-2022 | Guppy (v6.0.7)      | 195.9M | [55] |
| Sample 6 | ERR10502698 | 01-12-2022 | Guppy (v6.0.7)      | 135.1M | [55] |

---

N/A: not applicable.

Table S2. NCBI references used for the four eukaryotic species, *C. albicans*, *C. gattii*, *S. cerevisiae*, and *P. falciparum*.

| Species              | Reference                                                 |
|----------------------|-----------------------------------------------------------|
| <i>C. albicans</i>   | CP017623.1 <i>Candida albicans</i> SC5314                 |
| <i>C. gattii</i>     | CP000286.1 <i>Cryptococcus gattii</i> WM276               |
| <i>S. cerevisiae</i> | BK006935.2 TPA_inf: <i>Saccharomyces cerevisiae</i> S288C |
| <i>P. falciparum</i> | AL844501.2 <i>Plasmodium falciparum</i> 3D7               |

Table S3. Mapped reads percentage against the appropriate reference genome as detected by qualimap.

| Species              | Sample number | Coverage % |
|----------------------|---------------|------------|
| <i>C. albicans</i>   | Sample 1      | 99.25      |
|                      | Sample 2      | 88.57      |
|                      | Sample 3      | 99.29      |
|                      | Sample 4      | 99.59      |
|                      | Sample 5      | 97.39      |
|                      | Sample 6      | 99.23      |
| <i>C. gattii</i>     | Sample 1      | 98.53      |
|                      | Sample 2      | 98.57      |
|                      | Sample 3      | 91.7       |
|                      | Sample 4      | 98.54      |
|                      | Sample 5      | 93.93      |
|                      | Sample 6      | 95.71      |
| <i>S. cerevisiae</i> | Sample 1      | 99.45      |
|                      | Sample 2      | 99.7       |
|                      | Sample 3      | 97.53      |
|                      | Sample 4      | 96.53      |
|                      | Sample 5      | 96.53      |
|                      | Sample 6      | 86.44      |
| <i>P. falciparum</i> | Sample 1      | 99.77      |
|                      | Sample 2      | 99.96      |
|                      | Sample 3      | 99.94      |
|                      | Sample 4      | 99.98      |
|                      | Sample 5      | 100        |
|                      | Sample 6      | 100        |
